# Supplementary material
Source: PubMed Central journal article supplement (PMC3218214)
Supplement: NIHMS311134-supplement-01.pdf [file NIHMS311134-supplement-01.pdf]

## Risk Factors for Illicit Anabolic-Androgenic Steroid Use in Male Weightlifters: A Cross-Sectional Cohort Study

### Supplemental Information

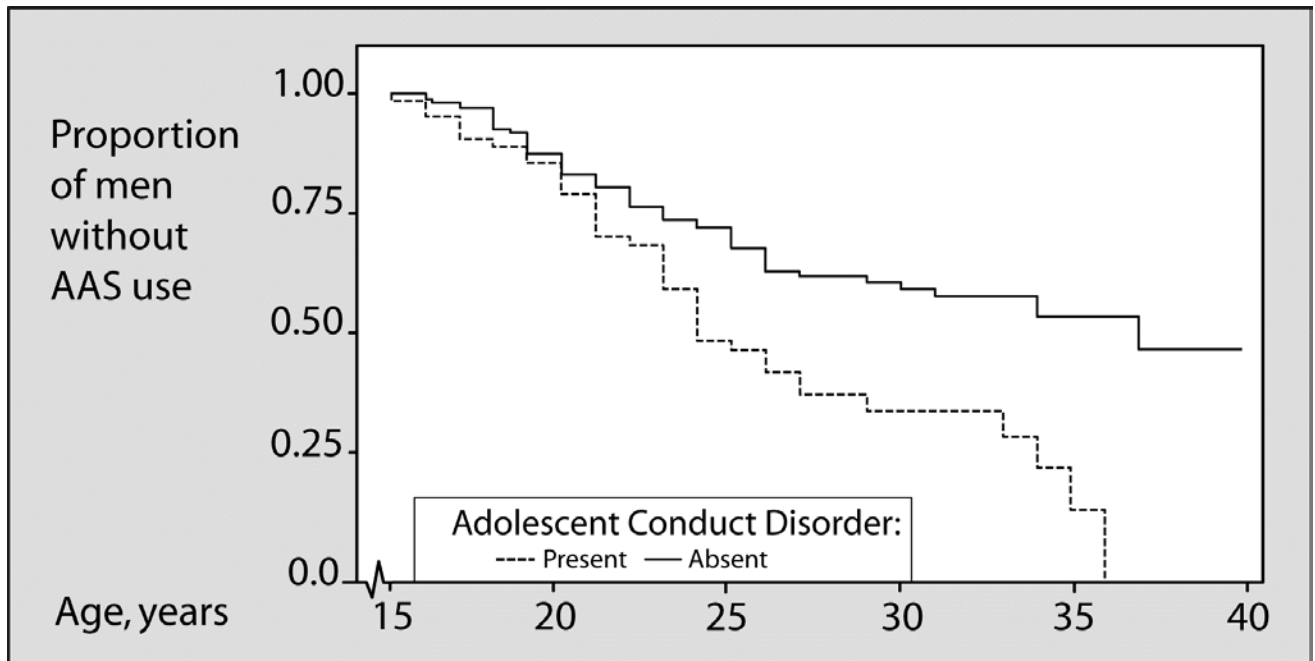

**Figure S1.** Kaplan-Meier curves for time to onset of anabolic-androgenic steroid (AAS) use in men reporting a history of childhood or adolescent conduct disorder versus men reporting no history of conduct disorder.

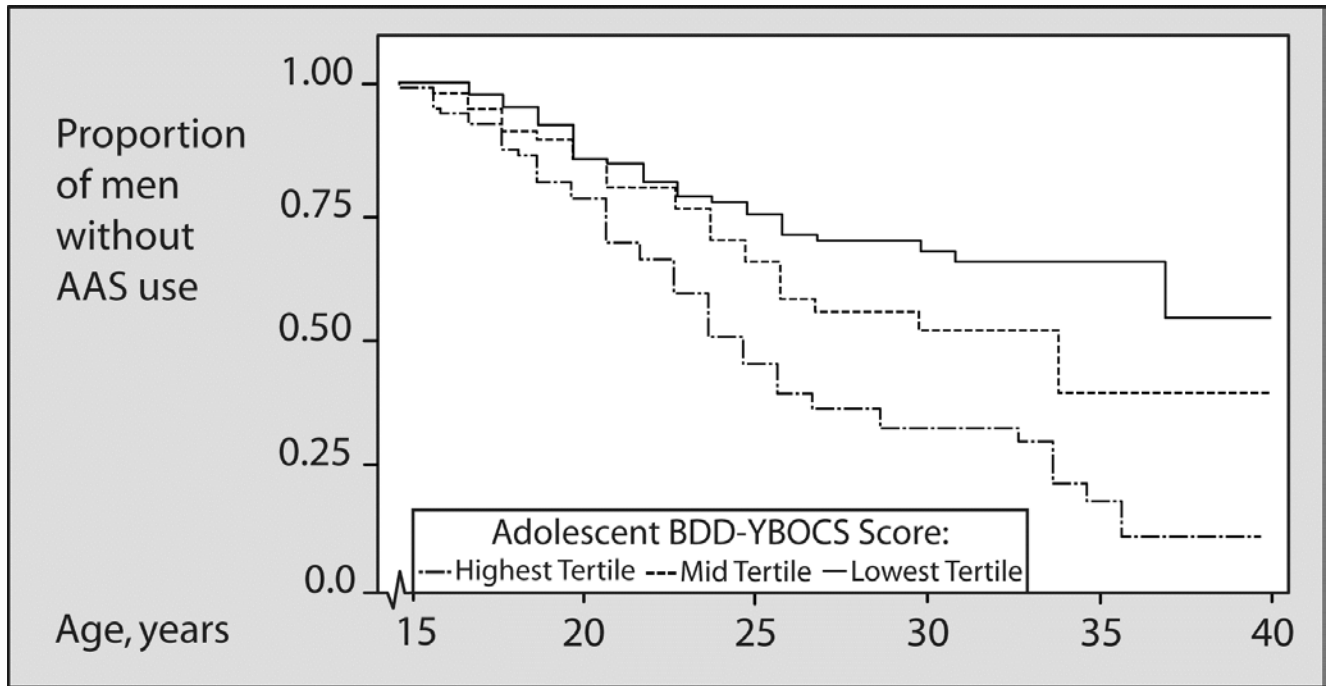

**Figure S2.** Kaplan-Meier curves for time to onset of anabolic-androgenic steroid (AAS) use in men in each of three tertiles of score on the retrospective “muscle dysmorphia” version of the Body Dysmorphic Disorder Modification of the Yale-Brown Obsessive Compulsive Scale (BDD-YBOCS).

**Table S1.** Childhood and Family Attributes of Study Participants

| Attribute                                            | N <sup>e</sup> | AAS Users |    | Hazard Ratio for AAS Use <sup>f</sup> |            |         | P For Trend <sup>g</sup> |
|------------------------------------------------------|----------------|-----------|----|---------------------------------------|------------|---------|--------------------------|
|                                                      |                | N         | %  | Estimate                              | 95% CI     | P Value |                          |
| <b>Single parent<sup>a</sup></b>                     |                |           |    |                                       |            |         |                          |
| No                                                   | 153            | 66        | 43 | 1.0                                   |            |         |                          |
| Yes                                                  | 74             | 31        | 42 | 0.91                                  | 0.59 - 1.4 | 0.66    |                          |
| <b>Family history of substance abuse<sup>b</sup></b> |                |           |    |                                       |            |         |                          |
| No                                                   | 154            | 58        | 38 | 1.0                                   |            |         |                          |
| Yes                                                  | 63             | 34        | 54 | 1.4                                   | 0.92 - 2.2 | 0.11    |                          |
| <b>Childhood sexual abuse<sup>c</sup></b>            |                |           |    |                                       |            |         |                          |
| No                                                   | 206            | 89        | 43 | 1.0                                   |            |         |                          |
| Yes                                                  | 22             | 10        | 45 | 0.90                                  | 0.46 - 1.8 | 0.77    |                          |
| <b>Childhood ADHD<sup>d</sup></b>                    |                |           |    |                                       |            |         |                          |
| No                                                   | 193            | 79        | 41 | 1.0                                   |            |         |                          |
| Yes                                                  | 40             | 23        | 58 | 1.5                                   | 0.94 - 2.4 | 0.092   |                          |
| <b>Conduct disorder<sup>d</sup></b>                  |                |           |    |                                       |            |         |                          |
| No                                                   | 168            | 61        | 36 | 1.0                                   |            |         |                          |
| Yes                                                  | 65             | 41        | 63 | 2.2                                   | 1.5 - 3.4  | < 0.001 |                          |
| <b>Childhood and Family Questionnaire:</b>           |                |           |    |                                       |            |         |                          |
| <b>Relationship with father</b>                      |                |           |    |                                       |            |         |                          |
| "Excellent"                                          | 59             | 17        | 29 | 1.0                                   |            |         |                          |
| "Good"                                               | 78             | 30        | 38 | 1.5                                   | 0.78 - 2.7 | 0.24    |                          |
| "Fair," "Poor," or "Terrible"                        | 81             | 46        | 57 | 2.4                                   | 1.4 - 4.3  | 0.003   | 0.001                    |
| <b>Relationship with mother</b>                      |                |           |    |                                       |            |         |                          |
| "Excellent"                                          | 114            | 51        | 45 | 1.0                                   |            |         |                          |
| "Good"                                               | 68             | 27        | 40 | 0.83                                  | 0.52 - 1.3 | 0.45    |                          |
| "Fair," "Poor," or "Terrible"                        | 39             | 19        | 49 | 1.2                                   | 0.67 - 2.0 | 0.60    | 0.68                     |
| <b>Parental Bonding Instrument:</b>                  |                |           |    |                                       |            |         |                          |
| <b>Father Care</b>                                   |                |           |    |                                       |            |         |                          |
| High (score 25 - 36)                                 | 82             | 24        | 29 | 1.0                                   |            |         |                          |
| Medium (score 18 - 24)                               | 70             | 32        | 46 | 1.4                                   | 0.83 - 2.5 | 0.20    |                          |
| Low (score 0 - 17)                                   | 66             | 37        | 56 | 1.9                                   | 1.1 - 3.2  | 0.025   | 0.023                    |
| <b>Father Overprotectiveness</b>                     |                |           |    |                                       |            |         |                          |
| Low (score 0 - 9)                                    | 77             | 29        | 38 | 1.0                                   |            |         |                          |
| Medium (score 10 - 15)                               | 70             | 25        | 36 | 0.86                                  | 0.50 - 1.5 | 0.60    |                          |
| High (score 16 - 33)                                 | 71             | 39        | 55 | 1.6                                   | 0.99 - 2.7 | 0.055   | 0.091                    |
| <b>Mother Care</b>                                   |                |           |    |                                       |            |         |                          |
| High (score 32 - 36)                                 | 78             | 29        | 37 | 1.0                                   |            |         |                          |
| Medium (score 24 - 31)                               | 75             | 33        | 44 | 1.1                                   | 0.64 - 1.8 | 0.80    |                          |
| Low (score 0 - 23)                                   | 68             | 35        | 51 | 1.4                                   | 0.85 - 2.3 | 0.19    | 0.21                     |

**Mother Overprotectiveness**

|                        |    |    |    |     |            |      |      |
|------------------------|----|----|----|-----|------------|------|------|
| Low (score 0 - 11)     | 72 | 26 | 36 | 1   |            |      |      |
| Medium (score 12 - 18) | 79 | 38 | 48 | 1.4 | 0.85 - 2.4 | 0.18 |      |
| High (score 19 - 39)   | 70 | 33 | 47 | 1.4 | 0.83 - 2.5 | 0.20 | 0.18 |

**25-Item Wender Utah Rating Scale for ADHD**

|                        |    |    |    |     |            |      |      |
|------------------------|----|----|----|-----|------------|------|------|
| Low (score 0 - 20)     | 77 | 28 | 36 | 1   |            |      |      |
| Medium (score 21 - 39) | 74 | 35 | 47 | 1.4 | 0.82 - 2.3 | 0.24 |      |
| High (score 40 - 86)   | 78 | 36 | 46 | 1.2 | 0.71 - 2.0 | 0.51 | 0.50 |

AAS, anabolic-androgenic steroids; ADHD, attention-deficit/hyperactivity disorder; CI, confidence interval.

<sup>a</sup> Lived with only one parent for at least some time prior to age 13 as a result of parental separation, divorce, or death.

<sup>b</sup> At least one first-degree relative judged to meet DSM-IV criteria for alcohol or illicit drug abuse or dependence, based on participant's report.

<sup>c</sup> Based on responses to the Childhood and Family Questionnaire (see text).

<sup>d</sup> Based on the Structured Clinical Interview for DSM-IV-Child Edition (see text).

<sup>e</sup> Total *N* is less than 233 for some items due to missing data (e.g., participants who lacked information about their biological parents).

<sup>f</sup> By proportional hazards model, with adjustment for race/ethnicity, study site, and birth cohort (see text).

<sup>g</sup> Calculated for the linear trend of the hazard ratios using the medians of the tertiles as a continuous variable.

**Table S2.** Adolescent Attributes of Study Participants

| Attribute                                              | N <sup>a</sup> | AAS Users |     | Hazard Ratio for AAS Use <sup>b</sup> |            |         | P For Trend <sup>c</sup> |
|--------------------------------------------------------|----------------|-----------|-----|---------------------------------------|------------|---------|--------------------------|
|                                                        |                | N         | (%) | Estimate                              | 95% CI     | P Value |                          |
| <b>Impulsive Sensation Seeking Scale</b>               |                |           |     |                                       |            |         |                          |
| Low (score 0 - 9)                                      | 72             | 27        | 38  | 1.0                                   |            |         |                          |
| Medium (score 10 - 14)                                 | 72             | 30        | 42  | 1.0                                   | 0.62 - 1.8 | 0.86    |                          |
| High (score 15 - 19)                                   | 85             | 42        | 49  | 1.4                                   | 0.85 - 2.4 | 0.18    | 0.18                     |
| <b>Adolescent Risk-Taking Questionnaire:</b>           |                |           |     |                                       |            |         |                          |
| <b>Thrill-Seeking Behaviors</b>                        |                |           |     |                                       |            |         |                          |
| Low (score 0 - 1.00)                                   | 80             | 37        | 46  | 1.0                                   |            |         |                          |
| Medium (score 1.14 - 1.43)                             | 69             | 30        | 43  | 0.92                                  | 0.56 - 1.5 | 0.76    |                          |
| High (score 1.57 - 3.14)                               | 80             | 32        | 40  | 0.74                                  | 0.45 - 1.2 | 0.23    | 0.24                     |
| <b>Rebellious Behaviors</b>                            |                |           |     |                                       |            |         |                          |
| Low (score 0 - 1.0)                                    | 70             | 25        | 36  | 1.0                                   |            |         |                          |
| Medium (score 1.2 - 2.2)                               | 81             | 31        | 38  | 0.81                                  | 0.47 - 1.4 | 0.45    |                          |
| High (score 2.4 - 4.0)                                 | 78             | 43        | 55  | 1.3                                   | 0.77 - 2.3 | 0.32    | 0.03                     |
| <b>Reckless Behaviors</b>                              |                |           |     |                                       |            |         |                          |
| Low (score 0 - 0.6)                                    | 79             | 25        | 32  | 1.0                                   |            |         |                          |
| Medium (score 0.8 - 1.4)                               | 74             | 30        | 41  | 1.3                                   | 0.74 - 2.2 | 0.38    |                          |
| High (score 1.6 - 3.2)                                 | 76             | 44        | 58  | 1.8                                   | 1.1 - 3.1  | 0.025   | 0.078                    |
| <b>Antisocial Behaviors</b>                            |                |           |     |                                       |            |         |                          |
| Low (score 0 - 0.8)                                    | 70             | 26        | 37  | 1.0                                   |            |         |                          |
| Medium (score 1.0 - 1.4)                               | 93             | 37        | 40  | 1.1                                   | 0.67 - 1.9 | 0.65    |                          |
| High (score 1.6 - 3.4)                                 | 66             | 36        | 55  | 1.5                                   | 0.89 - 2.6 | 0.12    | 0.094                    |
| <b>Eating Disorders Inventory (modified for boys):</b> |                |           |     |                                       |            |         |                          |
| <b>Drive for Thinness</b>                              |                |           |     |                                       |            |         |                          |
| Low (score 0)                                          | 114            | 43        | 38  | 1.0                                   |            |         |                          |
| Medium (score 1 - 2)                                   | 50             | 19        | 38  | 1.3                                   | 0.74 - 2.2 | 0.38    |                          |
| High (score 3 - 20)                                    | 65             | 37        | 57  | 2.0                                   | 1.3 - 3.1  | 0.003   | 0.002                    |
| <b>Bulimia</b>                                         |                |           |     |                                       |            |         |                          |
| Low (score 0)                                          | 155            | 62        | 40  | 1.0                                   |            |         |                          |
| Medium (score 1 - 2)                                   | 39             | 15        | 39  | 1.1                                   | 0.60 - 2.0 | 0.76    |                          |
| High (score 3 - 20)                                    | 35             | 22        | 63  | 1.9                                   | 1.2 - 3.1  | 0.011   | 0.009                    |
| <b>Interceptive Awareness</b>                          |                |           |     |                                       |            |         |                          |
| Low (score 0)                                          | 81             | 28        | 35  | 1.0                                   |            |         |                          |
| Medium (score 1 - 2)                                   | 65             | 28        | 43  | 1.4                                   | 0.80 - 2.3 | 0.26    |                          |
| High (score 3 - 19)                                    | 83             | 43        | 52  | 2.0                                   | 1.2 - 3.5  | 0.009   | 0.016                    |
| <b>Body Dissatisfaction</b>                            |                |           |     |                                       |            |         |                          |
| Low (score 0 - 2)                                      | 72             | 22        | 31  | 1.0                                   |            |         |                          |
| Medium (score 3 - 8)                                   | 85             | 35        | 41  | 1.3                                   | 0.76 - 2.3 | 0.33    |                          |
| High (score 9 - 24)                                    | 72             | 42        | 58  | 1.9                                   | 1.1 - 3.3  | 0.014   | 0.003                    |

|                                             |    |    |    |      |             |         |         |  |
|---------------------------------------------|----|----|----|------|-------------|---------|---------|--|
| <b>Ineffectiveness</b>                      |    |    |    |      |             |         |         |  |
| Low (score 0)                               | 70 | 18 | 26 | 1.0  |             |         |         |  |
| Medium (score 1 - 5)                        | 89 | 37 | 42 | 1.7  | 0.93 - 3.1  | 0.082   |         |  |
| High (score 6 - 26)                         | 70 | 44 | 63 | 3.0  | 1.7 - 5.4   | < 0.001 | < 0.001 |  |
| <b>Maturity Fears</b>                       |    |    |    |      |             |         |         |  |
| Low (score 0 - 1)                           | 67 | 29 | 43 | 1.0  |             |         |         |  |
| Medium (score 2 - 4)                        | 89 | 36 | 40 | 0.99 | 0.60 - 1.6  | 0.98    |         |  |
| High (score 4 - 18)                         | 73 | 34 | 47 | 1.2  | 0.71 - 1.9  | 0.54    | 0.44    |  |
| <b>Perfectionism</b>                        |    |    |    |      |             |         |         |  |
| Low (score 0 - 4)                           | 84 | 46 | 55 | 1.0  |             |         |         |  |
| Medium (score 5 - 8)                        | 79 | 29 | 37 | 0.61 | 0.38 - 0.99 | 0.046   |         |  |
| High (score 9 - 18)                         | 66 | 24 | 36 | 0.72 | 0.43 - 1.2  | 0.21    | 0.2     |  |
| <b>Interpersonal Distrust</b>               |    |    |    |      |             |         |         |  |
| Low (score 0 - 2)                           | 78 | 25 | 32 | 1.0  |             |         |         |  |
| Medium (score 3 - 5)                        | 71 | 33 | 46 | 1.6  | 0.92 - 2.7  | 0.096   |         |  |
| High (score 6 - 20)                         | 80 | 41 | 51 | 1.6  | 0.96 - 2.7  | 0.068   | 0.1     |  |
| <b>Total score</b>                          |    |    |    |      |             |         |         |  |
| Low (score 0 - 20)                          | 76 | 25 | 33 | 1.0  |             |         |         |  |
| Medium (score 21 - 33)                      | 78 | 32 | 41 | 1.4  | 0.83-2.5    | 0.19    |         |  |
| High (score 34 - 109)                       | 75 | 42 | 56 | 2.0  | 1.2 - 3.3   | 0.01    | 0.004   |  |
| <b>Adolescent Experience Questionnaire:</b> |    |    |    |      |             |         |         |  |
| <b>Physical Dominance</b>                   |    |    |    |      |             |         |         |  |
| High (score 23 - 30)                        | 72 | 28 | 39 | 1.0  |             |         |         |  |
| Medium (score 18 - 22.5)                    | 78 | 32 | 41 | 1.0  | 0.60 - 1.7  | 0.93    |         |  |
| Low (score 0 - 17.5)                        | 79 | 39 | 49 | 1.2  | 0.71 - 1.9  | 0.52    | 0.47    |  |
| <b>Physical Attractiveness</b>              |    |    |    |      |             |         |         |  |
| High (score 21.5 - 30)                      | 81 | 26 | 32 | 1.0  |             |         |         |  |
| Medium (score 16.5 - 21)                    | 74 | 34 | 46 | 1.4  | 0.81 - 2.4  | 0.23    |         |  |
| Low (score 0 - 16)                          | 74 | 39 | 53 | 2.0  | 1.2 - 3.4   | 0.008   | 0.015   |  |
| <b>Athleticism</b>                          |    |    |    |      |             |         |         |  |
| High (score 27.5 - 30)                      | 73 | 24 | 33 | 1.0  |             |         |         |  |
| Medium (score 21.5 - 27)                    | 78 | 32 | 41 | 1.4  | 0.79 - 2.3  | 0.27    |         |  |
| Low (score 0 - 21)                          | 78 | 43 | 55 | 2.2  | 1.3 - 3.6   | 0.004   | 0.003   |  |
| <b>Social Status</b>                        |    |    |    |      |             |         |         |  |
| High (score 24 - 30)                        | 72 | 26 | 36 | 1.0  |             |         |         |  |
| Medium (score 17.5 - 23.5)                  | 79 | 34 | 43 | 1.2  | 0.69 - 2.0  | 0.57    |         |  |
| Low (score 0 - 17)                          | 78 | 39 | 50 | 1.4  | 0.83 - 2.3  | 0.22    | 0.16    |  |
| <b>Sensitivity to Peer Pressure</b>         |    |    |    |      |             |         |         |  |
| Low (score 0 - 13)                          | 75 | 33 | 44 | 1.0  |             |         |         |  |
| Medium (score 13.5 - 18)                    | 77 | 33 | 43 | 0.80 | 0.48 - 1.3  | 0.40    |         |  |
| High (score 18.5 - 29)                      | 77 | 33 | 43 | 0.90 | 0.54 - 1.5  | 0.70    | 0.62    |  |

**Peer Drug Use**

|                            |    |    |    |      |            |      |      |
|----------------------------|----|----|----|------|------------|------|------|
| Low (score 0 - 10)         | 79 | 32 | 41 | 1.0  |            |      |      |
| Medium (score 10.5 - 17.5) | 75 | 29 | 39 | 0.83 | 0.50 - 1.4 | 0.49 |      |
| High (score 18 - 30)       | 75 | 38 | 51 | 1.3  | 0.77 - 2.1 | 0.35 | 0.35 |

**Drug Availability**

|                        |    |    |    |      |            |      |      |
|------------------------|----|----|----|------|------------|------|------|
| Low (score 0 - 14.5)   | 76 | 30 | 39 | 1.0  |            |      |      |
| Medium (score 15 - 22) | 77 | 37 | 48 | 1.1  | 0.66 - 1.8 | 0.77 |      |
| High (score 22.5 - 30) | 76 | 32 | 42 | 0.99 | 0.58 - 1.7 | 0.96 | 0.87 |

**BDD - YBOCS**

|                      |    |    |    |     |            |         |         |
|----------------------|----|----|----|-----|------------|---------|---------|
| Low (score 0 - 1)    | 90 | 27 | 30 | 1.0 |            |         |         |
| Medium (score 2 - 4) | 69 | 27 | 39 | 1.5 | 0.84 - 2.6 | 0.17    |         |
| High (score 5 - 34)  | 74 | 48 | 65 | 3.3 | 2.0 - 5.3  | < 0.001 | < 0.001 |

AAS, anabolic-androgenic steroids; BDD-YBOCS, retrospective "muscle dysmorphia" version of the Body Dysmorphic Disorder Modification of the Yale Brown Obsessive Compulsive Scale; CI, confidence interval.

<sup>a</sup> Total *N* is less than 233 for some items due to missing data.

<sup>b</sup> By proportional hazards model, with adjustment for race/ethnicity, study site, and birth cohort (see text).

<sup>c</sup> Calculated for the linear trend of the hazard ratios using the medians of the tertiles as a continuous variable.
